# Supplementary material for: The use of semi-structured interviews for the characterisation of farmer irrigation practices
Source: Copernicus journal article supplement (doi:10.5194/hess-20-1911-2016), 2016-05-12
Supplement: Supplementary file 1 [file hess-20-1911-2016-supplement.pdf]

Supplement of Hydrol. Earth Syst. Sci., 20, 1911–1924, 2016  
<http://www.hydrol-earth-syst-sci.net/20/1911/2016/>  
doi:10.5194/hess-20-1911-2016-supplement  
© Author(s) 2016. CC Attribution 3.0 License.

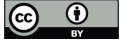

*Supplement of*

## **The use of semi-structured interviews for the characterisation of farmer irrigation practices**

**Jimmy O’Keeffe et al.**

*Correspondence to:* Jimmy O’Keeffe ([j.okeeffe12@imperial.ac.uk](mailto:j.okeeffe12@imperial.ac.uk))

The copyright of individual parts of the supplement might differ from the CC-BY 3.0 licence.

## Interview Topic Guide

| Date/Time | Location (name & GPS) | Interviewee ID |
|-----------|-----------------------|----------------|
|-----------|-----------------------|----------------|

### Farm and Crops

- Farm area
- Can you tell me what types of crops you grow? Why do you grow these types? Crop yield
- How would you describe the soil here? Does it affect how you decide which crop type you grow?
- Can you tell me about your crop calendar? When do you sow/harvest crops? Why these times?

### Irrigation Practices

- Can you tell me about your irrigation practices? What makes you decide to irrigate? How often? Why?
- How much water do you apply to your crops (depth)? Why this much water? Does this vary? Why?
- What makes you decide how much and how often you irrigate?
- Can you tell me about how you irrigate? (Irrigation method, time/ha, problems encountered)

### Water source

- Where do you get your water from? (if multiple sources try to get % split)
- What makes you decide where you get your water from? (Cost, distance, availability?)
- Do you think it is cheap or expensive to irrigate your crops? (Cost of irrigating at beginning/end of wheat/rice season by source (canal & tubewell))
- Do you sell any of your water? (Price, number of customers)
- If using well: Can you tell me about the well you use? (May be well owner or water buyer. Depth, age, water level at beginning end of season, well yield)
- If using canal: Can you tell me about irrigating using the canal? (how often do you use it, reliability)
- How long have you used your current water source(s)? Before this where did you get your water?
- Are there any other ways of storing collecting water on your land?
- Do you ever have problems with getting water when you need it? (water level dropping too much, well interference, access to well due to waiting for turn)
- Do you think that where you get your water from changes the way you use it? (efficiency, volume, time)
- Can you tell me about the pump you use? (diesel, electric, power, cost to run, problems with use)

### Other

- What do you think are the biggest challenges you face in farming? (water, labour, costs, access to resources)
- Have you noticed any changes in water availability? (Groundwater levels, canal reliability)
- Do you think the current farming practices can last? Why?
